## Identification of a calcitonin-like diuretic hormone that functions as an intrinsic modulator of the American lobster, *Homarus americanus*, cardiac neuromuscular system

A. E. Christie<sup>1,\*</sup>, J. S. Stevens<sup>2</sup>, M. R. Bowers<sup>2</sup>, M. C. Chapline<sup>1</sup>, D. A. Jensen<sup>3</sup>, K. M. Schegg<sup>3</sup>, J. Goldwaser<sup>2</sup>, M. A. Kwiatkowski<sup>2</sup>, T. K. Pleasant, Jr<sup>2</sup>, L. Shoenfeld<sup>2</sup>, L. K. Tempest<sup>2</sup>, C. R. Williams<sup>2</sup>, T. Wiwatpanit<sup>2</sup>, C. M. Smith<sup>1</sup>, K. M. Beale<sup>1</sup>, D. W. Towle<sup>1</sup>, D. A. Schooley<sup>3</sup> and P. S. Dickinson<sup>2</sup>

<sup>1</sup>Center for Marine Functional Genomics, Mount Desert Island Biological Laboratory, PO Box 35, Old Bar Harbor Road, Salisbury Cove, ME 04672, USA, <sup>2</sup>Department of Biology, Bowdoin College, 6500 College Station, Brunswick, ME 04672, USA and <sup>3</sup>Department of Biochemistry, University of Nevada, Reno, 1664 North Virginia Street, Reno, NV 89557, USA

\*Author for correspondence (achristi@mdibl.org)

Accepted 21 September 2009

### SUMMARY

In insects, a family of peptides with sequence homology to the vertebrate calcitonins has been implicated in the control of diuresis, a process that includes mixing of the hemolymph. Here, we show that a member of the insect calcitonin-like diuretic hormone (CLDH) family is present in the American lobster, *Homarus americanus*, serving, at least in part, as a powerful modulator of cardiac output. Specifically, during an ongoing EST project, a transcript encoding a putative *H. americanus* CLDH precursor was identified; a full-length cDNA was subsequently cloned. *In silico* analyses of the deduced prepro-hormone predicted the mature structure of the encoded CLDH to be GLDLGLGRGFSGSQAAKHLMGLAAANFAGGPamide (Homam-CLDH), which is identical to a known *Tribolium castaneum* peptide. RT-PCR tissue profiling suggests that Homam-CLDH is broadly distributed within the lobster nervous system, including the cardiac ganglion (CG), which controls the movement of the neurogenic heart. RT-PCR analysis conducted on pacemaker neuron- and motor neuron-specific cDNAs suggests that the motor neurons are the source of the CLDH message in the CG. Perfusion of Homam-CLDH through the isolated lobster heart produced dose-dependent increases in both contraction frequency and amplitude and a dose-dependent decrease in contraction duration, with threshold concentrations for all parameters in the range  $10^{-11}$  to  $10^{-10}$  mol l<sup>-1</sup> or less, among the lowest for any peptide on this system. This report is the first documentation of a decapod CLDH, the first demonstration of CLDH bioactivity outside the Insecta, and the first detection of an intrinsic neuropeptide transcript in the crustacean CG.

Key words: calcitonin-like diuretic hormone (CLDH), cardiac ganglion (CG), cardioactive peptide, diuretic hormone 31 (DH<sub>31</sub>), expressed sequence tag (EST), heart, neurohormone, neuromodulator, neuropeptide, reverse transcriptase polymerase chain reaction (RT-PCR), transcriptomics, *Homarus americanus*.

### INTRODUCTION

In hematophagous insects, and likely sap feeders as well, a rapid, post-feeding diuresis is needed to concentrate and process an ingested blood meal, the vast majority of which is water (Te Brugge et al., 2008; Coast, 2009). This diuretic event involves the coordination of a number of physiological processes that are under hormonal control, including transport of water and ions across the epithelium of the gut and Malpighian tubules, mixing of the blood meal within the digestive tract, mixing of the hemolymph, and, ultimately, expulsion of the waste derived from the fully digested food bolus (Coast, 2009). At present, a number of hormones have been implicated in the control of diuresis in insects, including the biogenic amine serotonin and several peptides (Coast, 2009), one of which shows structural similarity to members of the vertebrate calcitonin family (Furuya et al., 2000) and another to the corticotropin-releasing factor family of peptides (Kataoka et al., 1989).

Originally isolated from neural tissues of the cockroach *Diploptera punctata* (Furuya et al., 2000), isoforms of calcitonin-like diuretic hormone (CLDH) have subsequently been identified in a number of insect species (Coast et al., 2001; Coast et al., 2005; Schooley et al., 2005; Li et al., 2007; Te Brugge et al.,

2008). These peptides are all 31 amino acids in overall length in the Insecta, hence their alternative name, diuretic hormone 31 (DH<sub>31</sub>); they display a high degree of amino acid identity, and are amidated at their carboxyl (C)-termini (Table 1). In at least some insects, these CLDHs have been shown to increase the rate of fluid secretion by the Malpighian tubules (Furuya et al., 2000), to possess potent natriuretic potential (Coast et al., 2005), to be cardioactive (Te Brugge et al., 2008), and/or to modulate hindgut contractility (Te Brugge et al., 2008), all of which are important components of post-feeding diuresis.

Recently, a putative member of the CLDH family was identified *via* transcriptome analysis from the cladoceran crustacean *Daphnia pulex* (Gard et al., 2009). Like its insect counterparts, this Dappu-CLDH peptide is 31 amino acids in length, amidated at its C-terminus, and possesses extensive sequence similarity to the other known CLDHs. For example, Dappu-CLDH differs from the CLDH of *D. punctata* at only five residues (Table 1). In addition, an amino (N)-terminally extended isoform of CLDH (34 amino acids in length) was recently predicted from the deer tick *Ixodes scapularis*, a member of the arthropod subphylum Chelicerata (Christie, 2008a). These data suggest that members of the CLDH family are not restricted to insects, but may well be broadly conserved within the

Table 1. The structures of published arthropod calcitonin-like diuretic hormone (CLDH) isoforms

| Species                                 | Peptide structure                   | Reference              |
|-----------------------------------------|-------------------------------------|------------------------|
| <b>Insects</b>                          |                                     |                        |
| <i>Diptera punctata</i> <sup>1</sup>    | GLDLGLSRGFSGSQAAKHLMGLAAANYAGGPa    | Furuya et al., 2000    |
| <i>Apis mellifera</i> <sup>1</sup>      | GLDLGLSRGFSGSQAAKHLMGLAAANYAGGPa    | Schooley et al., 2005  |
| <i>Rhodnius prolixus</i> <sup>1</sup>   | GLDLGLSRGFSGSQAAKHLMGLAAANYAGGPa    | Te Brugge et al., 2008 |
| <i>Tribolium castaneum</i> <sup>2</sup> | GLDLGLGRGFSGSQAAKHLMGLAAANFAGGPa    | Li et al., 2007        |
| <i>Bombyx mori</i>                      | AFDLGLGRGYSGALQAKHLMGLAAANFAGGPa    | Schooley et al., 2005  |
| <i>Drosophila melanogaster</i>          | TVDFGLARGYSGTQEAHRMGLAAANFAGGPa     | Coast et al., 2001     |
| <i>Anopheles gambiae</i> <sup>3</sup>   | TVDFGLSRGYSGAQEAKHRMAMAVANFAGGPa    | Coast et al., 2005     |
| <i>Aedes aegypti</i> <sup>3</sup>       | TVDFGLSRGYSGAQEAKHRMAMAVANFAGGPa    | Schooley et al., 2005  |
| <b>Crustaceans</b>                      |                                     |                        |
| <i>Daphnia pulex</i>                    | GVDVFLGRGYSGSQAAKHLMGLAAANYAIGPa    | Gard et al., 2009      |
| <i>Homarus americanus</i> <sup>2</sup>  | GLDLGLGRGFSGSQAAKHLMGLAAANFAGGPa    | This study             |
| <b>Chelicerates</b>                     |                                     |                        |
| <i>Ixodes scapularis</i>                | AGGLLDVFLSRGASGAEAAKARLGLKLANDPYGPa | Christie, 2008         |

Abbreviations: a, amide.

Amino acids shared by all CLDH isoforms are highlighted in gray.

<sup>1</sup>The known/predicted CLDH isoform of these species is identical in structure.

<sup>2</sup>The known/predicted CLDH isoform of these species is identical in structure.

<sup>3</sup>The known/predicted CLDH isoform of these species is identical in structure.

Arthropoda. However, it is unknown what function(s) these peptides play in non-insects.

Here, using transcriptomics and molecular cloning, we have identified the first CLDH from a member of the crustacean order Decapoda. Specifically, a 31 amino acid, C-terminally amidated peptide, identical in structure to that of red flour beetle *Tribolium castaneum* DH<sub>31</sub> (Li et al., 2007), was predicted from the American lobster *Homarus americanus* (Table 1). Reverse transcriptase polymerase chain reaction (RT-PCR) tissue profiling suggests that Homam-CLDH is broadly distributed within the lobster nervous system, including the cardiac ganglion (CG), which controls the movement of the neurogenic heart (reviewed in Cooke, 2002). RT-PCR analysis conducted on the two classes of neurons present in the CG, the pacemaker neurons and the motor neurons (Cooke, 2002), suggests that it is the latter population of somata that express the CLDH transcript. Perfusion of the lobster cardiac neuromuscular system with Homam-CLDH elicited dose-dependent increases in both contraction amplitude and frequency and a dose-dependent decrease in burst duration, with threshold concentrations of less than 10<sup>-10</sup> mol l<sup>-1</sup> for each parameter, among the lowest seen for any peptide modulator on the heart. Collectively, our results show that an isoform of the CLDH family is present in decapod crustaceans, that this peptide is identical in structure to an insect CLDH, and that the peptide can function, at least in part, as a potent modulator of cardiac output. These data provide the first demonstration of bioactivity for a member of the CLDH family outside the Insecta. Moreover, our identification of Homam-CLDH transcript within the lobster CG, specifically in the motor neurons of the ganglion, is the first detection of an intrinsic peptide paracrine/hormone in this portion of the nervous system in any crustacean.

## MATERIALS AND METHODS

### Animals and tissue collection

American lobsters *H. americanus* Milne-Edwards were purchased from local suppliers in the Stonington and Brunswick areas of Maine (USA) and were maintained for up to 2 weeks in flow-through or recirculating natural seawater aquaria at 10–12°C. For tissue collection, animals were anesthetized by being packed in ice for 30–60 min, after which tissues [eyestalk ganglia, supraesophageal ganglion (brain), commissural ganglion, CG, heart muscle, midgut, and posterior midgut caecum] were collected *via* manual micro-

dissection in chilled physiological saline [composition in mmol l<sup>-1</sup>: NaCl 479.12, KCl 12.74, CaCl<sub>2</sub> 13.67, MgSO<sub>4</sub> 20.00, Na<sub>2</sub>SO<sub>4</sub> 3.91, Trizma base 11.45 and maleic acid 4.82 (pH 7.45)].

### Molecular cloning

#### cDNA library construction and EST submission

The construction and normalization of the *H. americanus* cDNA library used here has been described in detail in a previous report (Towle and Smith, 2006). In brief, multiple tissues (brain, gill, epipodite, branchiostegite, heart, ovary, testis, antennal gland, skeletal muscle and hepatopancreas) from four individuals (two males and two females) were collected; total RNA samples were prepared individually from each tissue, checked for quality, then pooled for construction and normalization of a cDNA library in the pCMV.SPORT6.1 vector by Invitrogen Corporation (Carlsbad, CA, USA). Plasmids were isolated and inserts single-pass sequenced from their 5' end using SP6 primer (5'-ATTTAGGTGACACTATAG-3') at the Marine DNA Sequencing and Analysis Facility at Mount Desert Island Biological Laboratory (Salisbury Cove, ME, USA). Sequence traces were processed for submission to dbEST [National Center for Biotechnology Information (NCBI); Bethesda, MD, USA] using the trace2dbest component of PartiGene software (University of Edinburgh, Edinburgh, UK). Prior to submission, all ESTs were subjected to blastx analysis, i.e. translated nucleotide sequence *versus* protein sequence (Altschul et al., 1997), and annotated accordingly.

#### cDNA sequence analysis

To further characterize the clone putatively identified by blastx analysis as encoding CLDH (i.e. clone HA\_MX1\_53h01), a sample of the bacteria (*Escherichia coli*) possessing the insert-containing vector was cultured overnight in LB-medium at 37°C. Plasmid containing the cDNA was subsequently isolated using a Wizard Plus Miniprep DNA Purification System (Promega, Madison, WI, USA; catalog no. A7500). The vector insert was then sequenced on an ABI 3100 16-capillary sequencer (Applied Biosystems Incorporated, Foster City, CA, USA) using both vector- and insert-specific forward and reverse sequencing primers (Integrated DNA Technologies, Inc., Coralville, IA, USA; Table 2). The sequence trace files resulting from each round of sequencing were analyzed using 4Peaks software (mekentosj.com), and the high quality

Table 2. Vector- and insert-specific primers used for sequencing the *Homarus americanus* calcitonin-like diuretic hormone (CLDH) cDNA

| Primer name             | Direction | Sequence                      |
|-------------------------|-----------|-------------------------------|
| Vector-specific primers |           |                               |
| SP6                     | Forward   | ATTTAGGTGACACTATAG            |
| T-Party                 | Reverse   | TTTTTTTTTTTTTTTTTTTTT         |
| Insert-specific primers |           |                               |
| CLDH F1                 | Forward   | GTGGTGGACCCAACATCAGTGACG      |
| CLDH F2                 | Forward   | GTTGGAGTTGCTGACGAGATTGG       |
| CLDH F3                 | Forward   | CAGGAGACCATCTTGTTAACTG        |
| CLDH F4                 | Forward   | TCCAGACAACGACGGTCAACCG        |
| CLDH R1                 | Reverse   | CCAATCTCGTCAGCAACTCCAAC       |
| CLDH R2                 | Reverse   | CTAGCTATTGGCCCTTATGATGGAGTGCC |

Abbreviations: V in T-Party represents A, T or G.

nucleotide sequences were aligned using Lasergene software (DNASTAR Inc., Madison, WI, USA).

As the cDNA sequenced from clone HA\_MX1\_53h01 was missing a portion of its putative 5' coding region, a SMART RACE cDNA Amplification Kit (Clontech/Takeda, Palo Alto, CA, USA) was used to obtain additional sequence information (the starting RNA was isolated as described below). The PCR products obtained using 5' rapid amplification of cDNA ends (RACE) were cloned into a pCR2.1 TOPO vector using a TOPO TA cloning kit (Invitrogen; catalog no. K4510-20) and sequenced and analyzed as described above.

#### Nucleotide translation and peptide prediction

Nucleotide translation and peptide prediction were conducted using a previously established protocol (Christie, 2008a; Christie, 2008b; Christie et al., 2008a; Gard et al., 2009; Dickinson et al., 2009; Ma et al., 2009; Stemmler et al., 2010). Specifically, cDNA sequence translation was done using the Translate tool of ExpASY (Swiss Institute of Bioinformatics, Basel, Switzerland; <http://www.expasy.ch/tools/dna.html>). Signal peptide and signal peptide cleavage prediction were performed *via* the online program SignalP 3.0, using both the Neural Networks and the Hidden Markov Models algorithms (Center for Biological Sequence Analysis, Technical University of Denmark, Lyngby, Denmark; <http://www.cbs.dtu.dk/services/SignalP/>) (Bendtsen et al., 2004). Pro-hormone cleavage sites were predicted based on the information presented by Veenstra (Veenstra, 2000). Prediction of the sulfation state of tyrosine residues was done using the online program Sulfinator (Swiss Institute of Bioinformatics, Geneva, Switzerland; <http://www.expasy.org/tools/sulfinator/>) (Monigatti et al., 2002). Other post-translational modifications (e.g. C-terminal amidation) were predicted by homology to known CLDH isoforms.

#### RT-PCR tissue profiling

Total RNA was isolated from freshly dissected lobster tissues (eyestalk ganglia, brain, commissural ganglion, CG, heart muscle, midgut proper and posterior midgut caecum) using an SV Total RNA Isolation System (Promega; catalog no. Z3100). For experiments using the eyestalk ganglia, commissural ganglion or the CG, tissues from 2–4 lobsters were pooled to obtain sufficient starting material. For some experiments, the X-organ region of the medulla terminalis of the eyestalk was excised for isolation of X-organ-specific RNA. Likewise, for some experiments, CGs were divided into pacemaker- and motor neuron-specific regions prior to RNA isolation. Each of the tissue types was processed individually and was first manually

minced in the RNA lysis buffer with spring scissors and then further homogenized using a QIASHredder spin-column homogenizer (Qiagen, Valencia, CA, USA; catalog no. 79654) prior to proceeding with RNA isolation. RNA concentration was determined using a Nanodrop ND1000 spectrophotometer (Thermo Scientific, Wilmington, DE, USA), while RNA quality was assessed using an Agilent 2100 Bioanalyzer (Agilent Technologies, Santa Clara, CA, USA). cDNA was synthesized from the isolated mRNA using a SuperScript™ III First-Strand Synthesis System for RT-PCR (Invitrogen; catalog no. 18080051). PCR was carried out on a DNA Engine thermocycler (Biorad Laboratories, Hercules, CA, USA) using gene-specific primers (Fig. 1) and GoTaq Master Mix (Promega; catalog no. M7138). To confirm the identity of the RT-PCR products, a sample of a given product was cloned into a pCR2.1 TOPO vector using a TOPO TA cloning kit (Invitrogen) and sequenced using vector-specific sequencing primers (Table 2) as described above.

#### Cardiac physiology

To assess the effects of Homam-CLDH on the neurogenic heart of *H. americanus*, we recorded the effects of perfusing the peptide through isolated lobster hearts. For these experiments, individual animals were cold-anesthetized by packing them in ice for 30–60 min, after which the posterior dorsal region of the thoracic carapace that lies directly over the heart, together with the underlying cardiac tissue, was removed. The dissected tissue, including the heart, was pinned through the carapace to the bottom of a small Sylgard 184 (KR Anderson, Santa Clara, CA, USA)-lined dish. The dorsal part of the heart remained attached to the carapace, so that the extent to which it was stretched was identical to that in the intact animal. The posterior artery was cannulated with a short piece of polyethylene tubing drawn out to fit the artery, and inserted into the heart. To verify that this perfusion system allowed the perfusate to enter the heart past the valve in the artery, we added low concentrations of fluorescein to the perfusate at the end of some experiments. The heart was continuously perfused with chilled physiological saline at a flow rate of 2.5 ml min<sup>-1</sup>. In some preparations, it was necessary to clip the ostial muscles so that perfusion fluid could leave the heart, and the heart did not become distended. In all preparations, a second perfusion line directed across the top of the heart helped to maintain temperature, which was monitored continuously and kept between 10 and 12°C. In all experiments, preparations were allowed to stabilize for 1–2 h before the first application of Homam-CLDH (synthesized at the University of Nevada, Reno), which was delivered through the posterior artery cannula for 8 min, after which the perfusion was switched back to control saline. Homam-CLDH was stored at –20°C as a 10<sup>-5</sup> mol l<sup>-1</sup> solution in deionized water, then diluted in saline to concentrations of 10<sup>-11</sup> to 10<sup>-8</sup> mol l<sup>-1</sup> just before use.

To record heart contractions, three anterior arteries (the median ophthalmic artery and the two lateral antennal arteries) were tied off with 6-0 suture silk and attached to a Grass FT03 force-displacement transducer (Astro-Med, West Warwick, RI, USA) at an angle of approximately 30 degrees, with an initial baseline tension of 2 g. The output of the transducer was amplified *via* a Brownlee 410 instrumentation amplifier (San Jose, CA, USA), and recorded onto a PC computer using a Micro 1401 data acquisition board and Spike2 version 6 software (Cambridge Electronic Design Limited, Cambridge, UK). Heart rate, contraction amplitude and contraction duration were measured using the built-in functions of Spike2 and a script custom written for this purpose. To calculate percent change, average heartbeat amplitudes, frequencies, and durations at the peak

**A**  
 (5') gacacgggctcgctcagtcaggtgaagactctcagctacagaccacagtcccccgccacttctgactcgcta  
 ccaactaccgcaactaccgccccccgacggataccgcccagtgatccacctgggtgctccccgctcttct  
 tttatccagacaacgacggtcaaccggtttagcctgatgaacagcagcggggcagtggtcgtttcttgggtgcgct  
 tcatcttctgtcttcaactccgcccctcaatagagagggcggcggtggtgcagatagaggaccggact  
 acgtgttggagttcctgacgaattggggcactccatcataagggccaatgagctagaaaaattcgtgcgttccctcg  
 gcagcgctaaagcaggattggatcttggcttggccctggctcagcgggtcacaggcagcaaacacctcatgggtc  
 tggcccgcccaacttccggggggcccgaggaggagagaagctctgacgatggcctgacctccaccagcagc  
 acaacctctacgccaagatcaggctgctgacctggccgagtcacacgataaattttgtggatgactaccatgtga  
 caacttacctctctctctcacaatgactccctctctctcgggtgctttctgctgctcactgcccgttctct  
 tctcaatagttctctcatatgctctcactcgtgtcattctcttctgattttctcgcacataagagaataaccocatctt  
 cacatcttgtggtgacccaacatcaatgacgcaataaatcccgagcattgtcaaccggctccctgaggacggtggg  
 ccccgctgggtggcgccgacgaccacacctcacagtaactcctgctgtagtccaccacaaggtgtttataaac  
 ttgtttctcagctgttaactgtagtaagattgcatatgatagcagtagacccttcatctatagaaatgatgtaa  
 gttaagcttcatcacagcctctgtcagaagggaggaagattgtgagcttgaattaaatagcatgagatacaatg  
 ttctctggaagggagttgtgtagtggttcattgtcattatccagaacttttttccaggtgctttacattgacct  
 ccggcttcaaatacatagctgactgtatagcacaacctgcttccattattttctcagtggtggaagactataaag  
 atgtttaagtggatgtaataactagggttcaggtaactatttaccagaggctgactacccccacactgatttta  
 ttcatagacaaggtcaggaaaaatgttcacgaatgtgtacttaacctggccaatgatattagaagaagccattcac  
 aaatcgagcctacagagcaggtctgtggataagcatttctgagtcattaccagagatgaaaccttgggatgggaa  
 aaacgcttccaaacctccctcctggccagtagcatccagcagcagacgactggttatgtcacttgtgacggtt  
 gatttacagtgtagaaactcattccatcgaagcaataacataatatttggctgcatgcttttaagaaatcgaact  
 gatggatcatattcatcagactttctcactgaaacataaatgtgctgtagctgctccgagtagtgacagttcaatattc  
 aggagaccatcttggtaactgtctctcactactaccttctctctcagctcattttcatataagttataagttt  
 cctgttaagtgcacatgggtgtagatcctctgctgggggtctctttatcactggtgagcggagggagcaacaagc  
 atgagagtgtagacagcaggatcctcccaccacctactctctctatgggctggaactgtctcaataagttaaagcac  
 agacaaatatttgtgctatataacaataccttgggttcaccttaatgtagataaaatgagcgtgctcagtcocaaaa  
 aaaaaaaaaaaaaaaaaaaaaaaaaaaaaaaaaaaaaaaaaaaaaaaaaaaaaaaaaaaaaaaaaaaaaaaaaaaaa  
 aaaaaaaaaaaaaaaaaaa (3')

**B**  
 MNSTGAVFVSLVVAIFVSSVNSAAFNREARAVVQIEDPDYVLELLTRLGHSIIIRANELEK FVRSSGSAKRGLDLGLG  
 RGFSGSQAAKHLMGLAAANFAGGPGRRRRSSDDGLDLHDDNLYAQDQAADLAESSR\*

**C**  
 MNSTGAVFVSLVVAIFVSSVNSAAFNREARAVVQIEDPDYVLELLTRLGHSIIIRANELEK FVRSSGSAKRGLDLGLG  
 RGFSGSQAAKHLMGLAAANFAGGPGRRRRSSDDGLDLHDDNLYAQDQAADLAESSR  
 ↓  
 AAFNREARAVVQIEDPDYVLELLTRLGHSIIIRANELEK FVRSSGSAKRGLDLGLGRGFSGSQAAKHLMGLAAANFAGG  
 PRRRRSSDDGLDLHDDNLYAQDQAADLAESSR  
 ↓  
 GLDLGLGRGFSGSQAAKHLMGLAAANFAGGPGRR  
 ↓  
 GLDLGLGRGFSGSQAAKHLMGLAAANFAGGPG  
 ↓  
 GLDLGLGRGFSGSQAAKHLMGLAAANFAGG Pamide

Fig. 1. Nucleotide and deduced amino acid sequences of *Homarus americanus* prepro-calcitonin-like diuretic hormone (Homam-CLDH). (A) Nucleotide sequence of *Homam-prepro-CLDH* (accession no. GQ290461). The open reading frame of the cDNA, including the stop codon, is shown in bold font, with the two 3' polyadenylation signal sequences indicated by underline in black. The two primers used for RT-PCR tissue profiling are underlined in green. (B) Deduced amino acid sequence of Homam-prepro-CLDH. The signal peptide is shown in gray, with prohormone convertase cleavage loci shown in black. The encoded CLDH isoform is shown in red, with additional precursor-related peptides shown in blue. The asterisk indicates the position of the stop codon. (C) Putative processing scheme resulting in the production of Homam-CLDH from its precursor protein. The first line of sequence shows the full-length prepro-hormone with the cleavage locus for signal peptidase underlined. The second line of sequence shows the cleaved pro-hormone with the loci for prohormone convertase underlined. The third line of sequence shows the immature CLDH peptide with the site of action for carboxypeptidase underlined. The fourth line of sequence shows the peptide resulting from carboxypeptidase activity with the Gly destined for  $\alpha$ -amidation underlined. The final line of sequence shows the putative, mature CLDH after full post-translational processing.

of the peptide effect, 5–6 min after the onset of peptide application, were measured for a 200s period and compared with those from the 200s just prior to peptide application. Data were further analyzed and graphed using Prism5 software (GraphPad Software, San Diego, CA, USA).

**RESULTS**

**Identification of the first decapod CLDH using molecular cloning and bioinformatics**

During an ongoing *H. americanus* EST project (Towle and Smith, 2006), a lobster transcript (accession no. EX487346) was serendipitously identified by blastx analysis as having significant homology (Bit score, 63.9; E-value, 6e–09) to a prepro-CLDH from the fruit fly *Drosophila melanogaster* (accession no. NP\_723401). Using a combination of vector- and insert-specific primers (Table 2), we sequenced the clone (HA\_MX1\_53h01) from which EX487346 was derived. While the resulting transcript appeared to be complete at its 3' end (i.e. a poly-A tail was identified), a portion of the 5' sequence appeared to be missing, including a section of the open reading frame (ORF) which putatively encodes the prepro-CLDH. Therefore, we used RACE to extend the clone in the 5' direction. This combination of methodology led to the cloning of a putative full-length prepro-CLDH cDNA (accession no. GQ290461). As is shown in Fig. 1A, this cDNA (named here *Homam-prepro-CLDH*) was 2117 base pairs (bp) in length, and consisted of a 187bp 5' untranslated region (UTR), a 408bp ORF (including the stop

codon) and a 1522 bp 3' UTR, which contained two polyadenylation signal sequences located 13 and 1204bp upstream of a 97bp poly-A tail.

Translation of the ORF of GQ290461 predicted a 135 amino acid prepro-hormone, named here Homam-prepro-CLDH (Fig. 1B,C). SignalP analysis of this sequence identified the first 23 amino acids as a signal peptide, with cleavage predicted between Ser<sup>23</sup> and Ala<sup>24</sup> by both the Neural Networks and the Hidden Markov Models algorithms (Fig. 1B,C). Within the remaining pro-hormone, three dibasic and two monobasic prohormone convertase processing sites were identified (Fig. 1B,C). In addition, the C-terminus of the pro-hormone is capped by an Arg residue. Cleavage at each of these sites, followed by carboxypeptidase activity and  $\alpha$ -amidation at the exposed Gly, is predicted to result in the liberation of five peptides from the pro-hormone (listed in their order of appearance in this protein; Fig. 1B,C): AAFNREA, AVVQIEDPDYVLELLTRLGHSII, ANELEK FVRSSGSA, GLDLGLGRGFSGSQAAKHLMGLAAANFAGG Pamide and SSDDGLDLHDDNLYAQDQAADLAESS. Analysis of the second of the predicted peptides by the program Sulfinator suggests that the position 10 Tyr is sulfated (E-value, 8.6), resulting in the putative mature structure AVVQIEDPDY(SO<sub>3</sub>H)VLELLTRLGHSII for this peptide. The fourth peptide, GLDLGLGRGFSGSQAAKHLMGLAAANFAGG Pamide, is a putative member of the CLDH family, named here Homam-CLDH; comparisons with other known CLDH/DH<sub>31</sub> isoforms revealed that Homam-CLDH is identical to a peptide



previously identified from the genome of the red flour beetle *T. castaneum*, i.e. Trica-DH<sub>31</sub> (Li et al., 2007) (Table 1).

#### RT-PCR tissue profiling identifies the cardiac ganglion as one source of Homam-CLDH

A mixed tissue source (brain, gill, epipodite, branchiostegite, heart, ovary, testis, antennal gland, skeletal muscle and hepatopancreas) was used as the starting material for the generation of the cDNA library from which clone HA\_MX1\_53h01 was derived. Mixed tissues (brain, heart, midgut and posterior midgut caecum) were likewise the starting material from which GQ290461 was subsequently cloned. Thus, a variety of tissues might be the source of the Homam-prepro-CLDH transcript described above. Using primers designed from the cDNA sequence of GQ290461 (Table 2), we conducted RT-PCR tissue profiling to assess the distribution of the lobster CLDH-encoding message. As Fig. 2 illustrates, a robust band the predicted size of the CLDH PCR product derived from the primer set illustrated in Fig. 1 (496 bp in length) was consistently detected in eyestalk ganglia (including in the X-organ), brain, commissural ganglion (part of the stomatogastric nervous system) and CG, all of which are neural tissues ( $N=4$  independent runs for each tissue). In contrast, no product was detected in either heart muscle or the midgut proper ( $N=4$  independent runs for each tissue; Fig. 2). Three faint bands (Fig. 2) were detected in posterior midgut caecum samples; however, none corresponded to the size of the predicted 496 bp product.

To confirm the identity of the detected PCR products, one sample from the CG was subcloned and sequenced. Sequence analysis confirmed that this 496 bp product was identical to the expected sequence predicted from GQ290461 (Fig. 1). In contrast, none of the three bands identified from the posterior midgut caecum were homologous to any portion of the Homam-prepro-CLDH transcript (data not shown).

While numerous peptide paracrines/hormones have been localized to the neurons of the lobster eyestalk ganglia (e.g. Ma et al., 2008), brain (e.g. Ma et al., 2008), and commissural ganglion (e.g. Stemmler et al., 2007; Dickinson et al., 2009; Stemmler et al., 2010), none have thus far been detected in the CG somata of *H. americanus*, or, for that matter, any crustacean species. As the organization of the lobster CG is such that the somata of the two types of neurons present in the ganglion, the pacemaker and the motor neurons, can be readily isolated from one another (Fig. 3A), we conducted RT-PCR profiling on neuron-specific tissue pools ( $N=3$  independent runs for each neuron type) in an attempt to determine in greater detail

the origin of the Homam-prepro-CLDH message in the CG. As Fig. 3B shows, a 496 bp PCR product was seen only in amplification of cDNA from the motor neurons, strongly suggesting that these cells, and not the pacemaker neurons, are the source of the CLDH-encoding transcript in the CG.

#### Homam-CLDH is a potent modulator of cardiac output

The cardiac neuromuscular system of decapods has been shown to be extensively modulated by a variety of peptide hormones (e.g. Mercier and Russenes, 1992; Wilkens et al., 2005; Cruz-Bermúdez et al., 2006; Cruz-Bermúdez and Marder, 2007; Dickinson et al., 2007; Fort et al., 2007a; Fort et al., 2007b; Christie et al., 2008b; Dickinson et al., 2009). As described earlier, one *H. americanus* tissue in which CLDH message was detected is the CG, which controls the rhythmic beating of the heart. Thus, we examined the effects of Homam-CLDH on the contractions of the isolated whole heart. Perfusion of the peptide ( $10^{-8}$  mol l<sup>-1</sup>) through the isolated whole heart increased both the amplitude and frequency of ongoing cardiac contractions (Fig. 4). As seen in Fig. 4A, both parameters increased rapidly, then returned slowly to baseline when the perfusion was returned to control saline. Higher speed recordings in Fig. 4B show more clearly the increases in these two parameters. In addition, it can be seen that contraction duration decreased during peptide perfusion.

The increases in both contraction amplitude and frequency were dose dependent, as was the decrease in contraction duration, with larger effects seen as the concentration of Homam-CLDH increased. Using the concentrations at which the percent change is significantly different from zero as the definition of threshold, we found that the threshold for the effects of Homam-CLDH on contraction amplitude was between  $10^{-10}$  and  $10^{-11}$  mol l<sup>-1</sup> (Fig. 5B), while the threshold for the effects on both frequency and duration was less than  $10^{-11}$  mol l<sup>-1</sup> (Fig. 5A,C). Consequently, the duty cycle (duration/period) increased with increasing peptide concentration. The effects on all three parameters at the lowest concentrations were minimal, but they were consistent across preparations, leading us to believe that even these low concentrations can cause reliable, if small, changes in cardiac output.

## DISCUSSION

### Identification of the first decapod calcitonin-like diuretic hormone

In insects, a family of peptides exhibiting sequence homology to the vertebrate calcitonins has been identified and shown to play roles

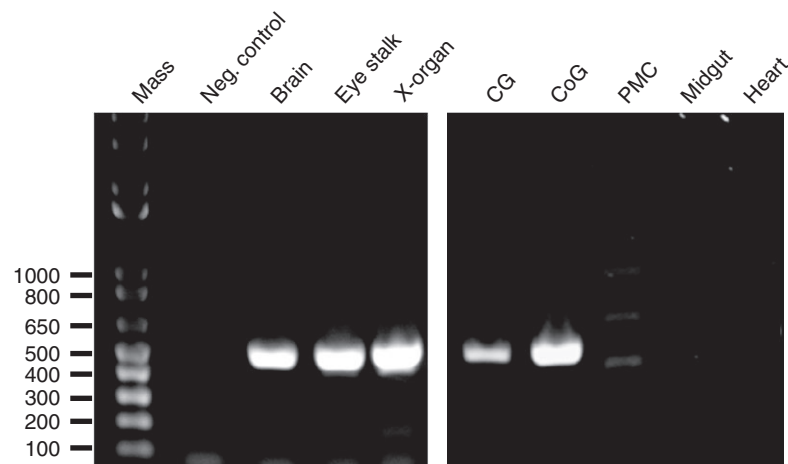

Fig. 2. RT-PCR profiling of *H. americanus* calcitonin-like diuretic hormone (Homam-CLDH) transcript in neural, midgut and cardiac tissues of the lobster. Using the gene-specific primer set shown in Fig. 1, RT-PCR tissue profiling was conducted to assess the distribution of the lobster CLDH-encoding message. A robust band of the predicted size of the CLDH PCR product (496 bp in length; base pair ladder shown in lane 1 of the left gel) was consistently detected in brain (lane 3 of the left gel), eyestalk ganglia [including in the X-organ (XO); lanes 4 and 5 of the left gel, respectively], cardiac ganglia (CG; lane 1 of the right gel) and commissural ganglia (CoG; lane 2 of the right gel). In contrast, no product was detected in the midgut proper or heart muscle (lanes 4 and 5 of the right gel, respectively). Three faint bands (Fig. 2) were detected in posterior midgut caecum (PMC; lane 3 of the right gel); however, none corresponded to the size of the predicted 496 bp product. No product was detected in the negative control (Neg. control; lane 1 of the right gel).

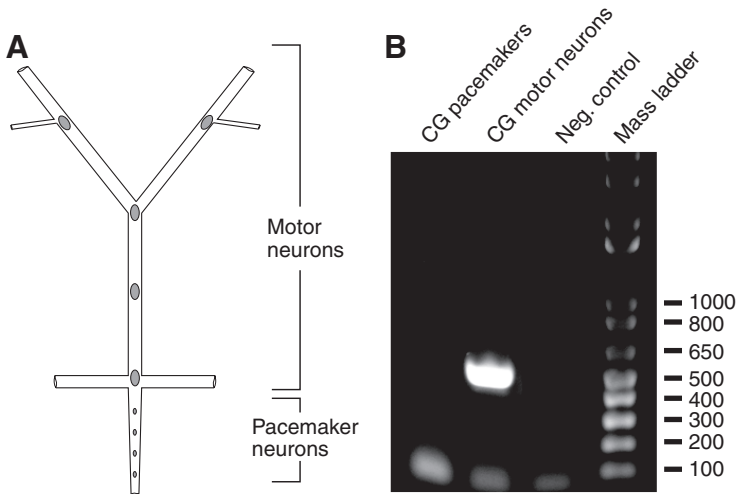

Fig. 3. RT-PCR profiling of *H. americanus* calcitonin-like diuretic hormone (Homam-CLDH) in the pacemaker neuron- and motor neuron-specific sub-regions of the lobster cardiac ganglion (CG). (A) Schematic representation of the lobster CG showing the location of the pacemaker and motor neurons within the ganglion. (B) RT-PCR profiling of CLDH message in the pacemaker (lane 1) and motor neurons (lane 2) of the cardiac ganglion. A robust band of the predicted CLDH PCR product size (496 bp in length; base pair ladder shown in lane 4) was consistently detected only in the motor neurons of the ganglion. No PCR product was detected in the negative control (lane 3).

in controlling the physiological processes underlying diuresis in at least some species. These peptides, commonly referred to as calcitonin-like diuretic hormones, are all 31 amino acids in length and are amidated at their C-termini (Table 1). All of the known insect CLDHs exhibit very similar amino acid sequences (Table 1), differing at most by 11 residues from one another. Recently a CLDH was predicted *via* transcriptomics from the cladoceran crustacean *D. pulex* (Gard et al., 2009). Like its insect counterparts, this peptide is 31 amino acids in length, is amidated at its C-terminus, and possesses an amino acid sequence similar to the insect CLDHs (Table 1). Though longer than the other family members, a 34 amino acid peptide predicted from the tick *I. scapularis*, a member of the Chelicerata, appears to be a member of the CLDH family as well (Christie, 2008a) (Table 1).

Here, *via* molecular cloning and bioinformatics, we have characterized a member of the CLDH family from the American lobster *H. americanus*, i.e. GLDLGLGRGFSGSQAAKHLMGLAAANFAGGPamide or Homam-CLDH. Like the insect and *Daphnia* peptides, Homam-CLDH is 31 amino acids in length and amidated at its C-terminus; it is the first CLDH to be identified from a member of the crustacean order Decapoda. Surprisingly, the structure of Homam-CLDH is identical to that of Trica-DH<sub>31</sub>, previously identified from the red flour beetle *T. castaneum* (Li et al., 2007). The extreme level of structural conservation of the CLDHs across the Arthropoda, and in particular within the Pancrustacea, suggests limited variation has been tolerated across evolution for this peptide family, and also that the CLDHs, and their receptor(s), play critical, and perhaps conserved, functions in members of this taxon.

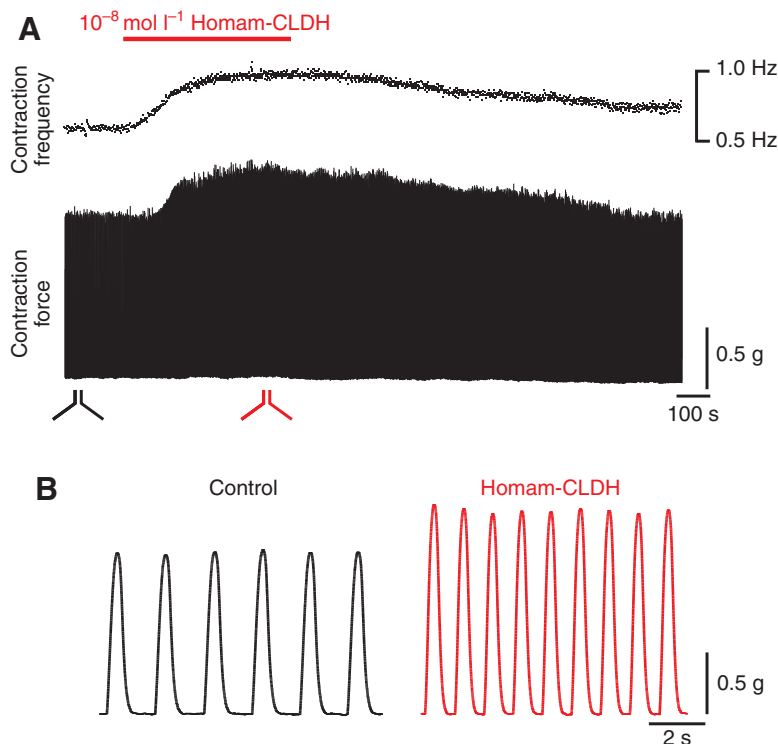

Fig. 4. *Homarus americanus* calcitonin-like diuretic hormone (Homam-CLDH) increased heartbeat frequency and contraction amplitude, and decreased duration of heart contractions. (A) Contraction frequency is shown graphically with time, on the same slow time scale as the recording of contraction force. Homam-CLDH ( $10^{-8} \text{ mol l}^{-1}$ ) was applied during the time indicated by the bar over the recordings. Both frequency and amplitude increased, then gradually returned to baseline values. (B) Higher speed recordings taken from the regions demarcated in A, showing the increases in amplitude and frequency and the decreased duration of the heartbeats.

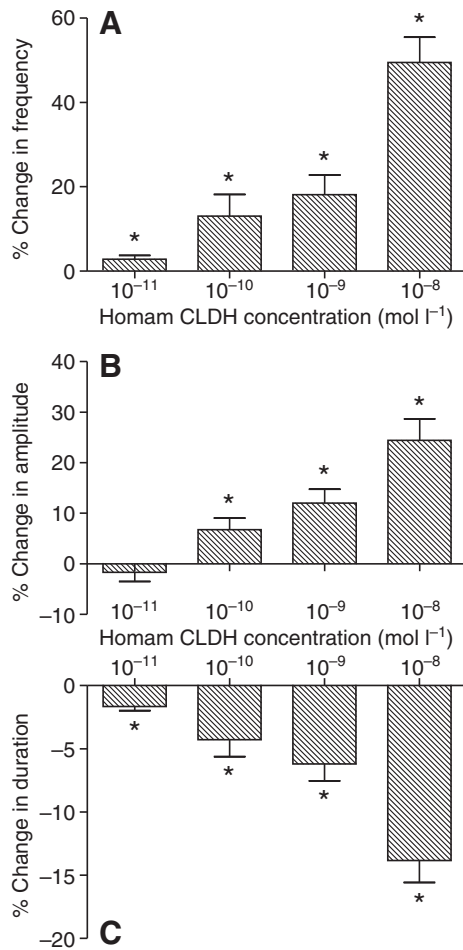

Fig. 5. The increases in both contraction amplitude and frequency, as well as the decrease in contraction duration, induced by *H. americanus* calcitonin-like diuretic hormone (Homam-CLDH) are dose dependent. Pooled data from preparations exposed to concentrations of Homam-CLDH ranging from  $10^{-8}$  to  $10^{-11}$  mol l<sup>-1</sup> showed that cycle frequency increased (A), contraction amplitude increased (B) and burst duration decreased (C), with larger effects at higher concentrations. Threshold, defined as the concentration at which per cent change is significantly different from zero, was less than  $10^{-10}$  mol l<sup>-1</sup> for all parameters. Specifically, threshold for the increase in contraction amplitude was between  $10^{-10}$  and  $10^{-11}$  mol l<sup>-1</sup>; threshold for both the increase in cycle frequency and the decrease in burst duration was less than  $10^{-11}$  mol l<sup>-1</sup>. \*Significantly different from zero, one-sample, 2-tailed *t*-test,  $P < 0.05$ ,  $N = 10$ . Error bars represent standard errors.

While Homam-CLDH is the only family member thus far identified from a decapod, preliminary transcriptome mining has identified a putative CLDH-encoding EST from the penaeid shrimp *Marsupenaeus japonicus* (accession no. C1997969; A.E.C., unpublished). Translation of this transcript suggests that it encodes a 97 amino acid N-terminal partial prepro-hormone. This deduced protein is very similar in structure to Homam-prepro-CLDH; it possesses a 23 amino acid signal peptide, a similar complement of prohormone convertase cleavage sites, and a nearly identical complement of predicted peptides, including a partial CLDH sequence that is identical to the first 26 amino acids of Homam-CLDH. As the remaining five amino acids are highly conserved within the lobster and many insects (Table 1), it seems likely that the *M. japonicus* peptide is identical in sequence to that of Homam-CLDH. If this is true, then GLDLGLGRGFSGSQAAKHLMGLA-

AANFAGGPamide may represent a highly conserved decapod CLDH, as *M. japonicus* is a member of the basal taxon of the Decapoda (i.e. the Penaeidea), while *H. americanus* (a member of the infraorder Astacidea) is more derived; several large-scale peptidomic investigations have recently documented broad, and perhaps ubiquitous, conservation of a number of decapod peptides, particularly those that appear to be encoded as a single copy, e.g. the C-type allatostatin pQIRYHQCYFNPISCF (Stemmler et al., 2010), the C-type allatostatin-like peptide SYWKQCAFNAVSCFamide (Dickinson et al., 2009) and the myosuppressin pQDLDHVFLRFamide (Stemmler et al., 2007), as is the case for Homam-CLDH. As more CLDHs are characterized from members of the Decapoda, it will be interesting to see whether this hypothesis is borne out.

#### The distribution of calcitonin-like diuretic hormone mRNA suggests pleiotropic paracrine/endocrine actions in *Homarus americanus*

Following our identification of Homam-CLDH, we embarked upon mapping the distribution of the peptide in lobster tissues. Initially, we attempted to do this *via* immunohistochemistry (data not shown), using an affinity-purified antibody generated against [Cys<sup>32</sup>]Dippu-DH<sub>31</sub>; this antibody was used previously to map the distribution of *Rhodnius prolixus*-DH<sub>31</sub> (e.g. Te Brugge et al., 2005; Te Brugge et al., 2008), as well as for immunohistochemistry in *Oncopeltus fasciatus* (Te Brugge and Orchard, 2008). Rhopr-DH<sub>31</sub> is identical in structure to Dippu-DH<sub>31</sub> (Te Brugge et al., 2008); *R. prolixus* and *O. fasciatus* are both Hemipterans and may contain the same CLDH. However, in the present study, the antibody failed to label any profiles in the *H. americanus* nervous system [eyestalk ganglia, brain, stomatogastric nervous system (including the paired commissural ganglia) and CG tested] or midgut (midgut proper and posterior midgut caecum tested) (data not shown). While Homam-CLDH and Dippu-DH<sub>31</sub> are similar in sequence (Table 1), the failure of the antibody to produce labeling in the lobster was not totally unexpected, as this antibody likewise did not label tissues from the beetle *Tenebrio molitor* (Holtzhausen and Nicolson, 2007). This is curious in that a peptide identical to Trica-DH<sub>31</sub>, the *T. castaneum*/*H. americanus* peptide, was isolated and identified in *T. molitor* (D.A.J. and D.A.S., unpublished) using a highly sensitive ELISA assay, which is extremely similar to that employed by Te Brugge and colleagues (Te Brugge et al., 2005); this ELISA used exactly the same antiserum as was used without success for immunohistochemistry in *T. molitor* and in the present study. The high affinity of this antiserum for the peptide in an ELISA, yet its inability to be used for immunohistochemistry, is paradoxical. Thus, we took an alternative approach to tissue mapping and used RT-PCR profiling to assay lobster tissues for the presence/absence of the peptide-encoding transcript.

Using RT-PCR, *Homam-prepro-CLDH* was detected in multiple neural tissues, i.e. the eyestalk ganglia (including in the X-organ), the brain, the commissural ganglia and the CG. No transcript was found in either heart muscle or midgut/posterior midgut caecum. The detection of *Homam-prepro-CLDH* in the brain was expected, as this region of the nervous system is a known source of the peptide in insects (e.g. Te Brugge et al., 2008). Likewise, detection of the transcript in the eyestalk ganglia and the commissural ganglion was not surprising, as both of these regions of the lobster nervous system have been shown to be the location of numerous peptidergic somata (e.g. Stemmler et al., 2007; Ma et al., 2008). In contrast, the finding of *Homam-prepro-CLDH* message in the CG was surprising; although the cardiac motor pattern is known to be extensively

modulated by peptide hormones (e.g. Mercier and Russenes, 1992; Wilkens et al., 2005; Cruz-Bermúdez et al., 2006; Cruz-Bermúdez and Marder, 2007; Dickinson et al., 2007; Fort et al., 2007a; Fort et al., 2007b; Christie et al., 2008b; Dickinson et al., 2009), no peptides have been identified within the ganglion itself. By dividing the CG into pacemaker neuron- and motor neuron-specific regions, we were able to localize the production of the CLDH transcript to the latter cell type. The presence of Homam-CLDH in the CG motor neurons suggests several possible functional roles for the peptide in the cardiac neuromuscular system, including modulation of the heart muscle innervated by the motor neurons and/or feedback modulation of the pacemaker cells by activity in the motor neurons.

As the name diuretic hormone implies, one role of CLDH peptides in at least a subset of insects is in the elimination of water after the ingestion of large quantities of fluid; in other insects, however, CLDHs appear to be minimally involved in diuresis (Coast, 2009). In the species in which CLDHs have been implicated in diuretic control, one component of this suite of diuresis-related events is increased mixing of the hemolymph (Te Brugge et al., 2008). The increased cardiac activity seen in the lobster would result in a similar increase in hemolymph mixing, suggesting the possibility that at least some of the functions of CLDH are conserved between insects and decapods. It would clearly be of interest to determine whether this peptide in *H. americanus* also alters water and ion transport and activity in the digestive tract. Preliminary data (M.R.B., T.W. and P.S.D., unpublished) suggest that it does not alter activity of the mid/hindgut or of the stomatogastric nervous system, which controls the movement of the foregut musculature.

#### **CLDH is a powerful cardioactive peptide in *H. americanus***

Like a number of neuropeptides, Homam-CLDH excites the heart by increasing both the frequency and amplitude of heart contractions. The low threshold at which it is active suggests a hormonal effect. Three major endocrine sites are thought to be responsible for releasing the majority of neuroactive peptides that are hormonally delivered in the lobster: the sinus gland, located in the eyestalks, and the pericardial organ, located on the lateral walls of the pericardial chamber that surrounds the heart, both of which are neuroendocrine organs, and the midgut (Cooke and Sullivan, 1982; Christie et al., 2007). Our RT-PCR data suggest that the sinus gland is one potential source of Homam-CLDH in the lobster, as the transcript encoding the peptide is present in the region of the eyestalk containing the X-organ, where the somata that give rise to the sinus gland are located (Cooke and Sullivan, 1982). Our RT-PCR data also suggest that the midgut is not responsible for the hormonal delivery of Homam-CLDH to the heart, since no Homam-prepro-CLDH transcript was found in this tissue. It was unfortunately not possible for us to determine whether the peptide is present in the pericardial organ, as the majority of the cell bodies that project to this neuroendocrine organ are located in the thoracic ganglia, which also contain numerous somata with other functions. As discussed earlier, no antibodies are presently available that recognize Homam-CLDH; thus, immunohistochemical mapping of the peptide in the pericardial organ was not possible.

Surprisingly, we found the transcript encoding Homam-CLDH in the CG itself, which suggests the possibility that it is also released locally to modulate the activity of the heart. While we have not yet applied the peptide at concentrations that might be expected for local release (e.g.  $10^{-7}$  or  $10^{-6}$  mol l<sup>-1</sup>), we would predict, based on the data presented here, that these concentrations would cause even larger increases in heart activity.

A large number of peptides have been shown to modulate the activity of various components of the crustacean cardiac neuromuscular system (e.g. Cruz-Bermúdez and Marder, 2007; Kuramoto and Ebara, 1984; Wilkens et al., 1996). In *H. americanus* this includes proctolin (Miller and Sullivan, 1981; Sullivan and Miller, 1984; Wilkens et al., 2005; Worden et al., 1995), crustacean cardioactive peptide (CCAP) (Wilkens et al., 1996), a number of FMRFamide-like peptides (Wilkens et al., 2005; Dickinson et al., 2007), two tachykinin-related peptides (Christie et al., 2008b) and the allatostatin C-like peptide SYWKQCAFNAVSCFamide (Dickinson et al., 2009). However, to the best of our knowledge, no peptide has previously been localized to the CG itself. In contrast, there is good evidence for the presence of amines and acetylcholine within the ganglion. For example, acetylcholine (Sullivan and Miller, 1990; Freschi and Livengood, 1989), gamma-amino-butyric acid (GABA) (Delgado et al., 2000) and dopamine (Fort et al., 2004), all of which modulate the activity of the heart, have been found within the ganglion. Both GABA and dopamine, although delivered locally, are nonetheless extrinsic modulators, since they derive from other sites in the nervous system. The neurons delivering dopamine, for example, are located in the commissural ganglia (Fort et al., 2004); fibers containing GABA found in the CG enter the ganglion from the dorsal nerve (Delgado et al., 2000). Acetylcholine, in contrast, is thought to be synthesized and released by neurons within the CG, where it may serve as a locally released transmitter to coordinate the activity of the pacemaker and motor neurons. It has, however, been shown to modulate the heartbeat *via* effects on both muscarinic and nicotinic receptors (Freschi and Livengood, 1989), and thus could also act as an intrinsic neuromodulator (Katz et al., 1994; Katz, 1998; Morgan et al., 2000).

The synthesis of Homam-CLDH by the motor neurons suggests that this peptide may function as an intrinsic neuromodulator. Interestingly, Morganelli and Sherman (Morganelli and Sherman, 1987) described a variety of different types of synapses in the *H. americanus* CG. Among these are several types that contain dense-core vesicles, a characteristic of peptidergic terminals. Moreover, two of the terminal types that contained large numbers of dense-core vesicles were found largely in the pacemaker region; these terminals did not include clear synaptic vesicles. Morganelli and Sherman suggested that these might be neurosecretory terminals that release modulatory transmitters to alter pacemaker activity. Although Morganelli and Sherman proposed that these terminals derived from extrinsic fibers that contain monoamines, a possibility raised by the identification of Homam-CLDH transcript in the CG motor neurons is that they instead represent a source of intrinsic peptidergic modulation. This possibility is consistent with the fact that axons from at least some of the motor neurons project to the region of the ganglion where the pacemaker cells are located (Cooke and Hartline, 1975).

An alternative possibility is that Homam-CLDH is released from the motor neurons onto the muscle at the periphery, where it could serve to enhance contraction when released. Similar peripheral peptidergic modulation of muscle has been seen in *Aplysia californica*, where the peptide cotransmitters small cardioactive peptides (SCP) A and B, which are released when the motor neuron fires at high spike frequencies, serve to enhance contraction of the accessory radula closer muscle (Whim and Lloyd, 1989; Whim and Lloyd, 1990). However, although peripheral modulation alone could explain the increased amplitude of heart contractions, it is the pacemaker cells within the CG that determine the heartbeat frequency. Thus, if the major target of CLDH is peripheral, we must postulate that feedback from the periphery is activated or modulated



to trigger the observed increases in contraction frequency. That such changes in contraction frequency could result from peripheral modulation and the consequent activation of stretch feedback pathways is strongly supported by a study showing that induced stretch is able to alter contraction frequency in the isopod *Ligia pallasii* (Sakurai and Wilkens, 2003). Alternatively, it is possible that intrinsically released CLDH has effects different from those recorded here in response to perfusion of the peptide through the whole heart. For example, intrinsically released peptide might modulate only amplitude, while hormonally delivered peptide modulates both frequency and amplitude of contraction. Experiments to determine the sites at which CLDH modulates the heart, by examining the peptide's effects on the isolated CG as well as on isolated cardiac muscle, are ongoing, as are attempts to generate an antibody that recognizes Homam-CLDH and can be utilized to determine the distribution of the peptide itself.

#### LIST OF ABBREVIATIONS

|                  |                                                 |
|------------------|-------------------------------------------------|
| CG               | cardiac ganglion                                |
| CLDH             | calcitonin-like diuretic hormone                |
| DH <sub>31</sub> | diuretic hormone 31                             |
| EST              | expressed sequence tag                          |
| ORF              | open reading frame                              |
| RACE             | rapid amplification of cDNA ends                |
| RT-PCR           | reverse transcriptase polymerase chain reaction |
| UTR              | untranslated region                             |

#### ACKNOWLEDGEMENTS

Financial support for this work was provided by NIH Grant Number P20 RR-016463 from the INBRE Program of the National Center for Research Resources (Patricia Hand, PhD, Principal Investigator), through institutional funds provided by MDIBL (to A.E.C.) and by the Nevada Agriculture Experiment Station (Grant NEV000337 to D.A.S.). Deposited in PMC for release after 12 months.

#### REFERENCES

- Altschul, S. F., Madden, T. L., Schäffer, A. A., Zhang, J., Zhang, Z., Miller, W. and Lipman, D. J. (1997). Gapped BLAST and PSI-BLAST: a new generation of protein database search programs. *Nucleic Acids Res.* **25**, 3389-3402.
- Bendtsen, J. D., Nielsen, H., von Heijne, G. and Brunak, S. (2004). Improved prediction of signal peptides: SignalP 3.0. *J. Mol. Biol.* **340**, 783-795.
- Christie, A. E. (2008a). Neuropeptide discovery in Ixodoidea: an *in silico* investigation using publicly accessible expressed sequence tags. *Gen. Comp. Endocrinol.* **157**, 174-185.
- Christie, A. E. (2008b). *In silico* analyses of peptide paracrines/hormones in Aphidoidea. *Gen. Comp. Endocrinol.* **159**, 67-79.
- Christie, A. E., Kutz-Naber, K. K., Stemmler, E. A., Klein, A., Messinger, D. I., Goiney, C. C., Conterato, A. J., Bruns, E. A., Hsu, Y. W., Li, L. et al. (2007). Midgut epithelial endocrine cells are a rich source of the neuropeptides APGFLGMRamide (*Cancer borealis* tachykinin-related peptide la) and GYRKPFFNGSIFamide (Gly<sup>1</sup>-SIFamide) in the crabs *Cancer borealis*, *Cancer magister* and *Cancer productus*. *J. Exp. Biol.* **210**, 699-714.
- Christie, A. E., Cashman, C. R., Brennan, H. R., Ma, M., Sousa, G. L., Li, L., Stemmler, E. A. and Dickinson, P. S. (2008a). Identification of putative crustacean neuropeptides using *in silico* analyses of publicly accessible expressed sequence tags. *Gen. Comp. Endocrinol.* **156**, 246-264.
- Christie, A. E., Cashman, C. R., Stevens, J. S., Smith, C. M., Beale, K. M., Stemmler, E. A., Greenwood, S. J., Towle, D. W. and Dickinson, P. S. (2008b). Identification and cardiotropic actions of brain/gut-derived tachykinin-related peptides (TRPs) from the American lobster *Homarus americanus*. *Peptides* **29**, 1909-1918.
- Coast, G. M. (2009). Neuroendocrine control of ionic homeostasis in blood-sucking insects. *J. Exp. Biol.* **212**, 378-386.
- Coast, G. M., Webster, S. G., Schegg, K. M., Tobe, S. S. and Schooley, D. A. (2001). The *Drosophila melanogaster* homologue of an insect calcitonin-like diuretic peptide stimulates V-ATPase activity in fruit fly Malpighian tubules. *J. Exp. Biol.* **204**, 1795-1804.
- Coast, G. M., Garside, C. S., Webster, S. G., Schegg, K. M. and Schooley, D. A. (2005). Mosquito natriuretic peptide identified as a calcitonin-like diuretic hormone in *Anopheles gambiae* (Giles). *J. Exp. Biol.* **208**, 3281-3291.
- Cooke, I. M. (2002). Reliable, responsive pacemaking and pattern generation with minimal cell numbers: the crustacean cardiac ganglion. *Biol. Bull.* **202**, 108-136.
- Cooke, I. M. and Hartline, D. K. (1975). Neurohormonal alteration of integrative properties of the cardiac ganglion of the lobster *Homarus americanus*. *J. Exp. Biol.* **63**, 33-52.
- Cooke, I. M. and Sullivan, R. E. (1982). Hormones and neurosecretion. In *The Biology of Crustacea*, Vol. 3 (ed. D. Bliss, H. Atwood, and D. Sandeman), pp. 205-290. New York: Academic Press.
- Cruz-Bermúdez, N. D. and Marder, E. (2007). Multiple modulators act on the cardiac ganglion of the crab, *Cancer borealis*. *J. Exp. Biol.* **210**, 2873-2884.
- Cruz-Bermúdez, N. D., Fu, Q., Kutz-Naber, K. K., Christie, A. E., Li, L. and Marder, E. (2006). Mass spectrometric characterization and physiological actions of GAHKNYLRamide, a novel FMRamide-like peptide from crabs of the genus *Cancer*. *J. Neurochem.* **97**, 784-799.
- Delgado, J. Y., Oyola, E. and Miller, M. W. (2000). Localization of GABA- and glutamate-like immunoreactivity in the cardiac ganglion of the lobster *Panulirus argus*. *J. Neurocytol.* **29**, 605-619.
- Dickinson, P. S., Stevens, J. S., Rus, S., Brennan, H. R., Goiney, C. C., Smith, C. M., Li, L., Towle, D. W. and Christie, A. E. (2007). Identification and cardiotropic actions of sulfakinin peptides in the American lobster *Homarus americanus*. *J. Exp. Biol.* **210**, 2278-2289.
- Dickinson, P. S., Wiwatpanit, T., Gabranski, E. R., Ackerman, R. J., Stevens, J. S., Cashman, C. R., Stemmler, E. A. and Christie, A. E. (2009). Identification of SYWKQCAFNAVSCamide: a broadly conserved crustacean C-type allatostatin-like peptide with both neuromodulatory and cardioactive properties. *J. Exp. Biol.* **212**, 1140-1152.
- Fort, T. J., Brezina, V. and Miller, M. W. (2004). Modulation of an integrated central pattern generator effector system: dopaminergic regulation of cardiac activity in the blue crab *Callinectes sapidus*. *J. Neurophysiol.* **92**, 3455-3470.
- Fort, T. J., Brezina, V. and Miller, M. W. (2007a). Regulation of the crab heartbeat by FMRamide-like peptides: multiple interacting effects on center and periphery. *J. Neurophysiol.* **98**, 2887-2902.
- Fort, T. J., García-Crescioni, K., Agrícola, H. J., Brezina, V. and Miller, M. W. (2007b). Regulation of the crab heartbeat by crustacean cardioactive peptide (CCAP): central and peripheral actions. *J. Neurophysiol.* **97**, 3407-3420.
- Freschi, J. E. and Livengood, D. R. (1989). Membrane current underlying muscarinic cholinergic excitation of motoneurons in lobster cardiac ganglion. *J. Neurophysiol.* **62**, 984-995.
- Furuya, K., Milchak, R. J., Schegg, K. M., Zhang, J., Tobe, S. S., Coast, G. M. and Schooley, D. A. (2000). Cockroach diuretic hormones: characterization of a calcitonin-like peptide in insects. *Proc. Natl. Acad. Sci. USA* **97**, 6469-6474.
- Gard, A. L., Lenz, P. H., Shaw, J. R. and Christie, A. E. (2009). Identification of putative peptide paracrines/hormones in the water flea *Daphnia pulex* (Crustacea: Branchiopoda: Cladocera) using transcriptomics and immunohistochemistry. *Gen. Comp. Endocrinol.* **160**, 271-287.
- Holtzhausen, W. D. and Nicolson, S. W. (2007). Beetle diuretic peptides: The response of mealworm (*Tenebrio molitor*) Malpighian tubules to synthetic peptides, and cross-reactivity studies with a dung beetle (*Onthophagus gazella*). *J. Insect Physiol.* **53**, 361-369.
- Kataoka, H., Troetschler, R. G., Li, J. P., Kramer, S. J., Carney, R. L. and Schooley, D. A. (1989). Isolation and identification of a diuretic hormone from the tobacco hornworm, *Manduca sexta*. *Proc. Natl. Acad. Sci. USA* **86**, 2976-2980.
- Katz, P. S. (1998). Neuromodulation intrinsic to the central pattern generator for escape swimming in *Tritonia*. *Ann. N. Y. Acad. Sci.* **860**, 181-188.
- Katz, P. S., Getting, P. A. and Frost, W. N. (1994). Dynamic neuromodulation of synaptic strength intrinsic to a central pattern generator circuit. *Nature* **367**, 729-731.
- Kuramoto, T. and Ebara, A. (1984). Neurohormonal modulation of the cardiac outflow through the cardioarterial valve in the lobster. *J. Exp. Biol.* **111**, 123-130.
- Li, B., Predel, R., Neupert, S., Hauser, F., Tanaka, Y., Cazzamali, G., Williamson, M., Arakane, Y., Verleyen, P., Schoofs, L., Schachtner, J., Grimmelikhuijzen, C. J. and Park, Y. (2007). Genomics, transcriptomics, and peptidomics of neuropeptides and protein hormones in the red flour beetle *Tribolium castaneum*. *Genome Res.* **18**, 113-122.
- Ma, M., Chen, R., Sousa, G. L., Bors, E. K., Kwiatkowski, M. A., Goiney, C. C., Goy, M. F., Christie, A. E. and Li, L. (2008). Mass spectral characterization of peptide transmitters/hormones in the nervous system and neuroendocrine organs of the American lobster *Homarus americanus*. *Gen. Comp. Endocrinol.* **156**, 395-409.
- Ma, M., Bors, E. K., Dickinson, P. S., Kwiatkowski, M. A., Sousa, G. L., Henry, R. P., Smith, C. M., Towle, D. W., Christie, A. E. and Li, L. (2009). Characterization of the *Carcinus maenas* neuropeptidome by mass spectrometry and functional genomics. *Gen. Comp. Endocrinol.* **161**, 320-334.
- Mercier, A. J. and Russenes, R. T. (1992). Modulation of crayfish hearts by FMRamide-related peptides. *Biol. Bull.* **182**, 333-340.
- Miller, M. W. and Sullivan, R. E. (1981). Some effects of proctolin on the cardiac ganglion of the Maine Lobster, *Homarus americanus* (Milne Edwards). *J. Neurobiol.* **12**, 629-639.
- Monigatti, F., Gasteiger, E., Bairoch, A. and Jung, E. (2002). The Sulfinator: predicting tyrosine sulfation sites in protein sequences. *Bioinformatics* **18**, 769-770.
- Morgan, P. T., Perrins, R., Lloyd, P. E. and Weiss, K. R. (2000). Intrinsic and extrinsic modulation of a single central pattern generating circuit. *J. Neurophysiol.* **84**, 1186-1193.
- Morganelli, P. M. and Sherman, R. G. (1987). Nerve terminals and synapses in the cardiac ganglion of the adult lobster *Homarus americanus*. *J. Morphol.* **191**, 177-191.
- Sakurai, A. and Wilkens, J. L. (2003). Tension sensitivity of the heart pacemaker neurons in the isopod crustacean *Ligia pallasii*. *J. Exp. Biol.* **206**, 105-115.
- Schooley, D. A., Horodyski, F. M. and Coast, G. M. (2005). Hormones controlling homeostasis in insects. In *Comprehensive Molecular Insect Science*, Vol. 3, *Endocrinology* (ed. L. I. Gilbert, K. Iatrou and S. S. Gill), pp. 493-550. Oxford: Elsevier Pergamon.
- Stemmler, E. A., Cashman, C. R., Messinger, D. I., Gardner, N. P., Dickinson, P. S. and Christie, A. E. (2007). High-mass-resolution direct-tissue MALDI-FTMS reveals broad conservation of three neuropeptides (APGFLGMRamide, GYRKPFFNGSIFamide and pQLDLHVFLRFamide) across members of seven decapod crustacean infraorders. *Peptides* **28**, 2104-2115.
- Stemmler, E. A., Bruns, E. A., Cashman, C. R., Dickinson, P. S. and Christie, A. E. (2010). Molecular and mass spectral identification of the broadly conserved decapod crustacean neuropeptide pQIRYHQCYFNPISCF: the first PISCF-allatostatin (*Manduca sexta*- or C-type allatostatin) from a non-insect. *Gen. Comp. Endocrinol.* **165**, 1-10.

- Sullivan, R. E. and Miller, M. W.** (1984). Dual effects of proctolin on the rhythmic burst activity of the cardiac ganglion. *J. Neurobiol.* **15**, 173-196.
- Sullivan, R. E. and Miller, M. W.** (1990). Cholinergic activation of the lobster cardiac ganglion. *J. Neurobiol.* **21**, 639-650.
- Te Brugge, V. A. and Orchard, I.** (2008). Distribution and activity of a Dippu-DH31-like peptide in the large milkweed bug *Oncopeltus fasciatus*. *Peptides* **29**, 206-213.
- Te Brugge, V. A., Lombardi, V. C., Schooley, D. A. and Orchard, I.** (2005). Presence and activity of a Dippu-DH31-like peptide in the blood-feeding bug, *Rhodnius prolixus*. *Peptides* **26**, 29-42.
- Te Brugge, V. A., Schooley, D. A. and Orchard, I.** (2008). Amino acid sequence and biological activity of a calcitonin-like diuretic hormone (DH31) from *Rhodnius prolixus*. *J. Exp. Biol.* **211**, 382-390.
- Towle, D. W. and Smith, C. M.** (2006). Gene discovery in *Carcinus maenas* and *Homarus americanus* via expressed sequence tags. *Int. Comp. Biol.* **46**, 912-918.
- Veenstra, J. A.** (2000). Mono- and dibasic proteolytic cleavage sites in insect neuroendocrine peptide precursors. *Arch. Insect Biochem. Physiol.* **43**, 49-63.
- Whim, M. D. and Lloyd, P. E.** (1989). Frequency-dependent release of peptide cotransmitters from identified cholinergic motor neurons in *Aplysia*. *Proc. Natl. Acad. Sci. USA* **86**, 9034-9038.
- Whim, M. D. and Lloyd, P. E.** (1990). Neuropeptide cotransmitters released from an identified cholinergic motor neuron modulate neuromuscular efficacy in *Aplysia*. *J. Neurosci.* **10**, 3313-3322.
- Wilkens, J. L., Kuramoto, T. and McMahon, B. R.** (1996). The effects of six pericardial hormones and hypoxia on the semi-isolated heart and sternal arterial valve of the lobster *Homarus americanus*. *Comp. Biochem. Physiol. C Pharmacol. Toxicol. Endocrinol.* **114**, 57-65.
- Wilkens, J. L., Shinozaki, T., Yazawa, T. and ter Keurs, H. E. D. J.** (2005). Sites and modes of action of proctolin and FLP F2 on lobster cardiac muscle. *J. Exp. Biol.* **208**, 737-747.
- Worden, M. K., Kravitz, E. A. and Goy, M. F.** (1995). Peptide F1, an N-terminally extended analog of FMRFamide, enhances contractile activity in multiple target tissues in lobster. *J. Exp. Biol.* **198**, 97-108.
